# Supplementary material
Source: PubMed Central journal article supplement (PMC6060363)
Supplement: JB.00215-18_zjb016184827s1.pdf [file JB.00215-18_zjb016184827s1.pdf]

| <i>sap</i> strain         | Complementation  |                  | Allele         | Nucleotide Change at Position | AA Change                         |
|---------------------------|------------------|------------------|----------------|-------------------------------|-----------------------------------|
|                           | pAlgO            | pMucP            |                |                               |                                   |
| <i>sap16,17,23, 24,25</i> | Alg <sup>+</sup> | Alg <sup>+</sup> | <i>algO500</i> | A > C at 1499                 | Q500P                             |
| <i>sap22, 26, 27, 31</i>  | Alg <sup>+</sup> | Alg <sup>+</sup> | <i>algO107</i> | Insertion of T at 321         | Frameshift after aa 106           |
| <i>sap32</i>              | Alg <sup>+</sup> | Alg <sup>+</sup> | <i>algO336</i> | Deletion of GAAGTGATT at 1006 | Inframe deletion ( $\Delta$ 3 aa) |
| <i>sap42</i>              | Alg <sup>+</sup> | Alg <sup>+</sup> | <i>algO55</i>  | G > T at 163                  | E55Stop                           |
| <i>sap46,47</i>           | Alg <sup>+</sup> | Alg <sup>+</sup> | <i>algO516</i> | G > A at 1547                 | G516D                             |
| <i>sap20, 21</i>          | Alg <sup>-</sup> | Alg <sup>+</sup> | <i>mucP392</i> | Deletion of G at 1174         | Frameshift after aa 391           |
| <i>sap30</i>              | Alg <sup>-</sup> | Alg <sup>+</sup> | <i>mucP159</i> | insertion of C at 475         | Frameshift after aa 158           |
| <i>sap36</i>              | Alg <sup>-</sup> | Alg <sup>+</sup> | <i>mucP304</i> | Deletion of GCGGGGG at 910    | Frameshift after aa 303           |

Supplementary Table S1. Summary of mutants obtained from this study.

PDO300  
(Vector)

Figure S1

PAO1  
(Vector)*sap17*  
(Vector)*sap20*  
(pMucP)*sap17*  
(pMucP)*sap20*  
(Vector)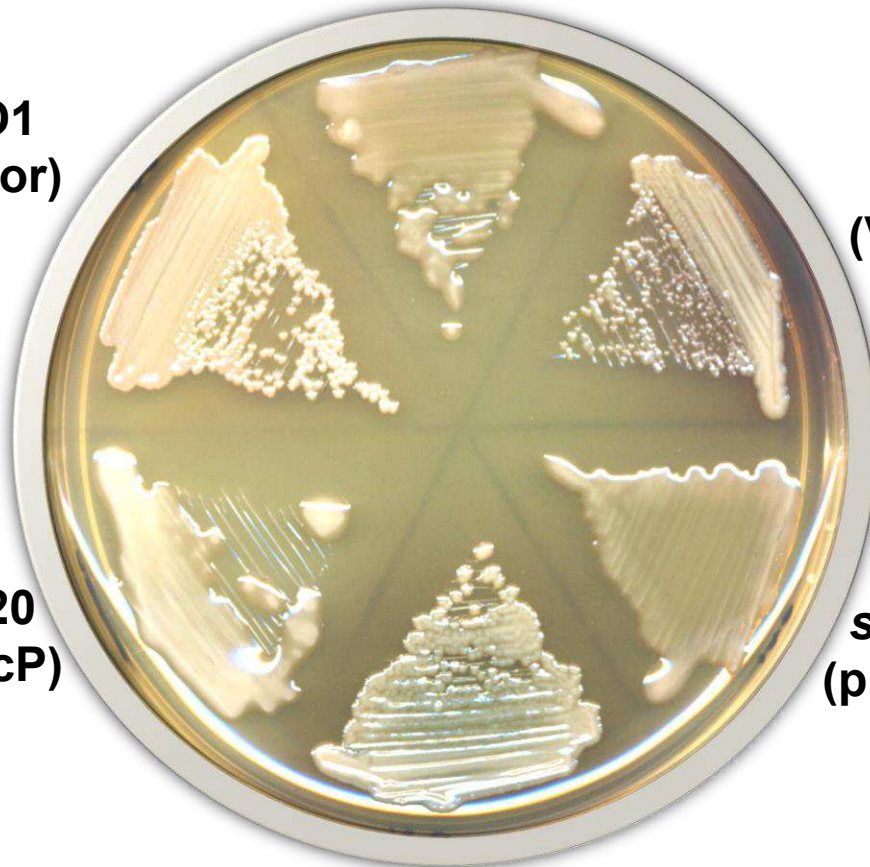

**FIG S1. Complementation of *sap17* and *sap20* mutations by *mucP*.** The *sap* mutants display a nonmucoid phenotype similar to PAO1, and a mucoid phenotype when a *mucP*-containing plasmid is introduced into these strains, similar to the parental PDO300 strain. Cells were inoculated on LB plates containing carbenicillin in the presence of 1mM IPTG and were incubated at 37°C for 24 hrs. . Strains containing pMF54 plasmids lacking the *mucP* gene are labelled as 'Vector'.

## Supplemental

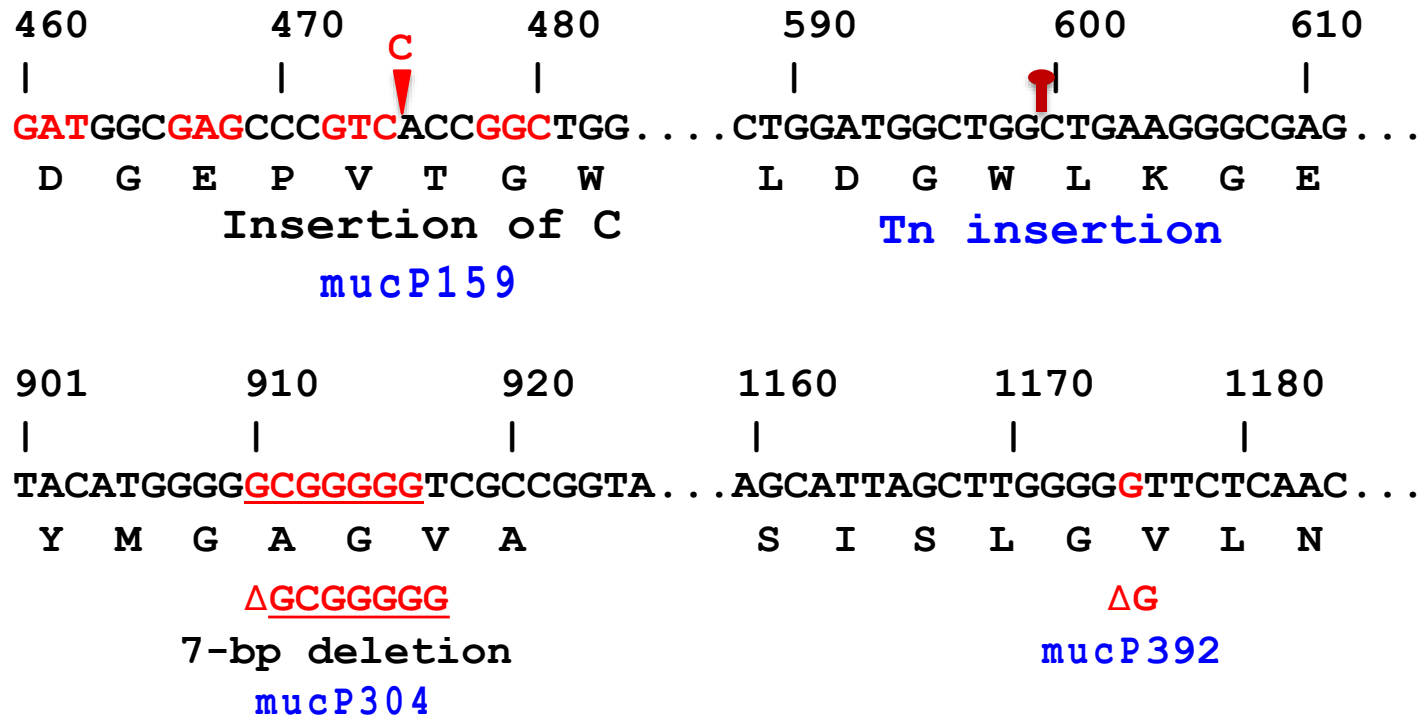

**FIG S2. DNA sequences of *mucP* mutations.** The EZ::Tn insertion was mapped between nucleotide 599 and 600 of the *mucP* coding sequence, with the first nucleotide of the coding sequence designated as 1; the red symbol indicates the position of the transposon insertion. The *sap30* mutation is now designated as *mucP159*; *sap36* is now *mucP304* and *sap20* and *sap21* are now designated *mucP392*
